# Supplementary material for: A Novel Role of Pipecolic Acid Biosynthetic Pathway in Drought Tolerance through the Antioxidant System in Tomato
Source: MDPI journal article supplement (doi:10.3390/antiox10121923), 2021-11-30
Supplement: s1 [file s1]

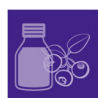

# Supplementary Materials: A Novel Role of Pipecolic Acid Biosynthetic Pathway in Drought Tolerance through the Antioxidant System in Tomato

Ping Wang <sup>1</sup>, Qian Luo <sup>1</sup>, Weicheng Yang <sup>1</sup>, Golam Jalal Ahammed <sup>1</sup>, Shuting Ding <sup>1</sup>, Xingyu Chen <sup>1</sup>, Jiao Wang <sup>1</sup>, Xiaojian Xia <sup>1,2</sup> and Kai Shi <sup>1,2,\*</sup>

<sup>1</sup> Department of Horticulture, Zhejiang University, Hangzhou 310058, China; 11916061@zju.edu.cn (P.W.); 11916062@zju.edu.cn (Q.L.); 3170100209@zju.edu.cn (W.Y.); ahammed@haust.edu.cn (G.J.A.); 3130100256@zju.edu.cn (S.D.); 12016053@zju.edu.cn (X.C.); 11616046@zju.edu.cn (J.W.); xiaojianxia@zju.edu.cn (X.X.)

<sup>2</sup> Zhejiang Provincial Key Laboratory of Horticultural Plant Integrative Biology, Hangzhou 310058, China

\* Correspondence: kaishi@zju.edu.cn

**Table S1.** Primers used for various applications in the present study.

| Genes         | Accession Numbers | Forward Primer (5'–3')                          | Reverse Primer (5'–3')                                  | Application                                  |
|---------------|-------------------|-------------------------------------------------|---------------------------------------------------------|----------------------------------------------|
| SIALD1        | Solyc11g044840    | gattgtgttctccaacaatccac                         | aaacgtgggattgttgagaacac                                 | CRISPR/Cas9 gene-editing vector construction |
| SIFMO1        | Solyc07g04243     | gattgtacttggctagtgtttag                         | aaacctaacaactagccaagtac                                 | CRISPR/Cas9 gene-editing vector construction |
| <i>Slald1</i> | Solyc11g044840    | catttcagtgagttactct                             | ctttctagaacccgggattt                                    | Mutant plants verification                   |
| <i>Slfmo1</i> | Solyc07g04243     | cctaagaatatcgaaatttg                            | atggctattatccgctcgaa                                    | Mutant plants verification                   |
| SIALD1        | Solyc11g044840    | cgggttctagaaaggttgcc                            | caatccaccagcctgagcta                                    | qRT-PCR                                      |
| SIFMO1        | Solyc07g04243     | cactgaggcggataagggaa                            | ggaactctaccagactgcga                                    | qRT-PCR                                      |
| SIALD1        | Solyc11g044840    | ctctcgagctttcgcgagctc<br>atgtttctctttcatgcaacc  | gcccttgctcaccatggatccattt<br>gtgtgacaaagtaagggttatgagtc | Subcellular localization                     |
| SIFMO1        | Solyc07g04243     | ctctcgagctttcgcgagctc<br>atggctattatccgctcgaaaa | gcccttgctcaccatggatcc<br>cttctcctctgcataatcttggc        | Subcellular localization                     |
